# Supplementary material for: The Comparison of Laparoscopic Colorectal Resection with Natural Orifice Specimen Extraction versus Mini-Laparotomy Specimen Extraction for Colorectal Tumours: A Systematic Review and Meta-Analysis of Short-Term Outcomes
Source: J Oncol. 2020 Jan 31;2020:6204264. doi: 10.1155/2020/6204264 (PMC7218971; doi:10.1155/2020/6204264)
Supplement: Supplementary Materials — Figure S1: subgroup analysis results of operative time: (a) based on specimen extraction route (SER), (b) based on sample size, (c) based on publication year. Figure S2: subgroup analysis results of intraoperative blood loss: (a) based on specimen extraction route (SER), (b) based on sample size, (c) based on publication year. Figure S3: subgroup analysis results of postoperative pain scores: (a) based on specimen extraction route (SER), (b) based on sample size, (c) based on publication year. Figure S4: subgroup analysis results of duration of hospital stay: (a) based on specimen extraction route (SER), (b) based on sample size, (c) based on publication year. Table S1: quality assessment based on the NOS for retrospective studies. Text S1: the search strategy of Embase. [file 6204264.f1.zip › 6204264.f1/supplementary materials/S1_Text.txt]

Embase
Session Results
.......................................................
No.  Query Results                                          Results  Date       
#11. #7 AND #10                                                 176  27 Mar 2019
#10. #8 OR #9                                                 1,488  27 Mar 2019
#9.  'transvaginal specimen extraction':ab,ti OR              1,462  27 Mar 2019
     'transanal specimen extraction':ab,ti OR 
     'transrectal specimen extraction':ab,ti OR 
     'transcolonic specimen extraction':ab,ti OR 
     'natural orifice transluminal endoscopic 
     surgery':ab,ti
#8.  'natural orifice specimen extraction'/exp                   35  27 Mar 2019
#7.  #1 OR #2 OR #3 OR #4 OR #5 OR #6                       366,579  27 Mar 2019
#6.  'colonic neoplasms':ab,ti OR 'colonic                   68,975  27 Mar 2019
     neoplasm':ab,ti OR 'neoplasm, colonic':ab,ti OR 
     'neoplasms, colonic':ab,ti OR 'colon 
     neoplasms':ab,ti OR 'colon neoplasm':ab,ti OR 
     'neoplasm, colon':ab,ti OR 'neoplasms, 
     colon':ab,ti OR 'cancer of colon':ab,ti OR 'colon 
     cancers':ab,ti OR 'cancer of the colon':ab,ti OR 
     'colonic cancer':ab,ti OR 'cancer, colonic':ab,ti 
     OR 'cancers, colonic':ab,ti OR 'colonic 
     cancers':ab,ti OR 'colon cancer':ab,ti OR 
     'cancer, colon':ab,ti OR 'cancers, colon':ab,ti
#5.  'colon tumor'/exp                                      302,393  27 Mar 2019
#4.  'rectal neoplasms':ab,ti OR 'neoplasm,                  37,216  27 Mar 2019
     rectal':ab,ti OR 'rectal neoplasm':ab,ti OR 
     'rectum neoplasms':ab,ti OR 'neoplasm, 
     rectum':ab,ti OR 'rectum neoplasm':ab,ti OR 
     'rectal tumors':ab,ti OR 'rectal tumor':ab,ti OR 
     'tumor, rectal':ab,ti OR 'neoplasms, 
     rectal':ab,ti OR 'cancer of rectum':ab,ti OR 
     'rectum cancers':ab,ti OR 'rectal cancer':ab,ti 
     OR 'cancer, rectal':ab,ti OR 'rectal 
     cancers':ab,ti OR 'rectum cancer':ab,ti OR 
     'cancer, rectum':ab,ti OR 'cancer of the 
     rectum':ab,ti
#3.  'rectum tumor'/exp                                     236,824  27 Mar 2019
#2.  'colorectal neoplasms':ab,ti OR 'neoplasms,            151,915  27 Mar 2019
     colorectal':ab,ti OR 'colorectal neoplasm':ab,ti 
     OR 'neoplasm, colorectal':ab,ti OR 'colorectal 
     tumors':ab,ti OR 'colorectal tumor':ab,ti OR 
     'tumor, colorectal':ab,ti OR 'tumors, 
     colorectal':ab,ti OR 'colorectal carcinoma':ab,ti 
     OR 'carcinoma, colorectal':ab,ti OR 'carcinomas, 
     colorectal':ab,ti OR 'colorectal 
     carcinomas':ab,ti OR 'colorectal cancer':ab,ti OR 
     'cancer, colorectal':ab,ti OR 'cancers, 
     colorectal':ab,ti OR 'colorectal cancers':ab,ti
#1.  'colorectal tumor'/exp                                  28,037  27 Mar 2019
.......................................................
